# Supplementary material for: Rapid transcriptional plasticity of duplicated gene clusters enables a clonally reproducing aphid to colonise diverse plant species
Source: PubMed Central journal article supplement (PMC5304397; doi:10.1186/s13059-016-1145-3), 2017-02-13

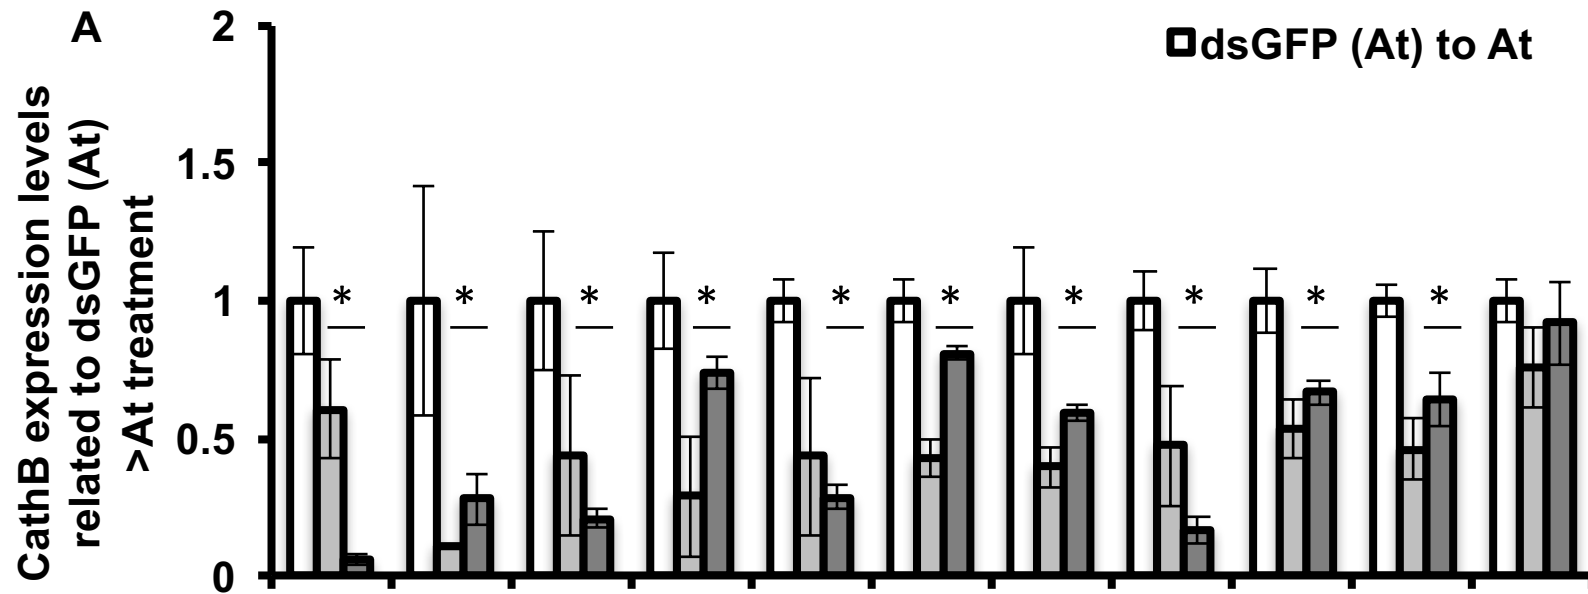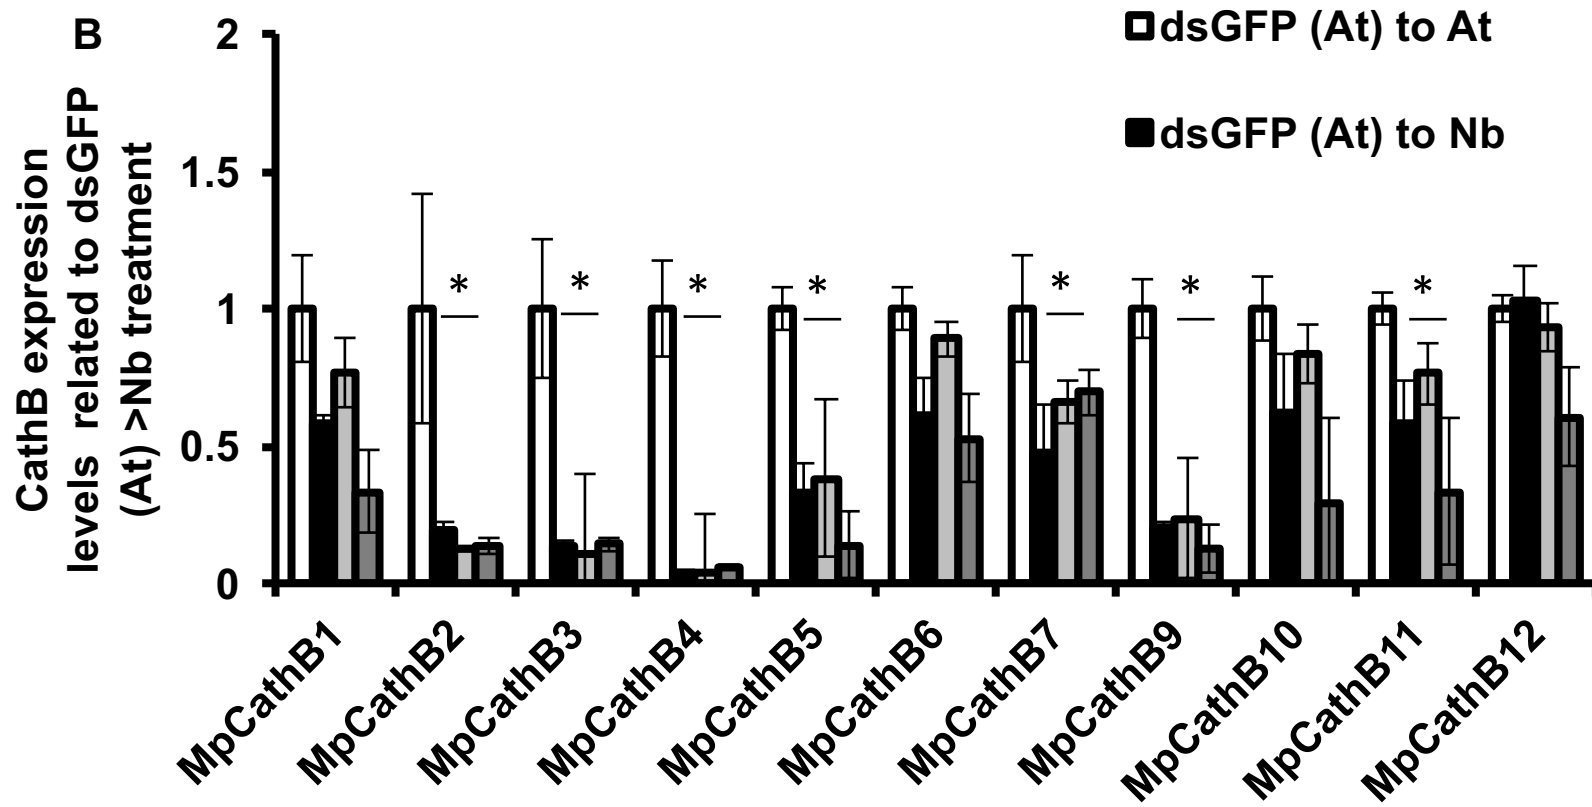

Supplement: 13059_2016_1145_MOESM20_ESM.pdf [file 13059_2016_1145_MOESM20_ESM.pdf]
