# Supplementary material for: Rapid transcriptional plasticity of duplicated gene clusters enables a clonally reproducing aphid to colonise diverse plant species
Source: PubMed Central journal article supplement (PMC5304397; doi:10.1186/s13059-016-1145-3), 2017-02-13
Supplement: 13059_2016_1145_MOESM21_ESM.pdf [file 13059_2016_1145_MOESM21_ESM.pdf]

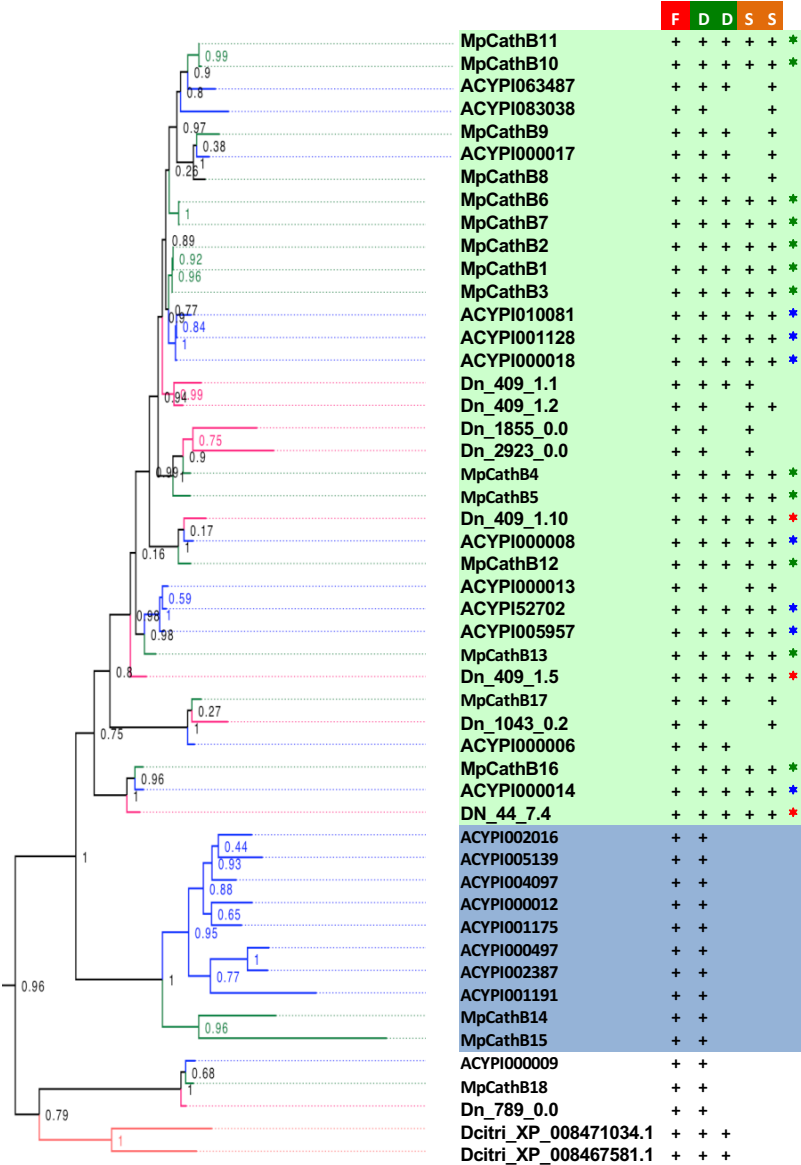

|          | InterPro | Description                                         |
|----------|----------|-----------------------------------------------------|
| <b>F</b> | Family   | IPR013128 Peptidase C1A                             |
| <b>D</b> | Domain   | IPR000668 Peptidase C1A, papain C-terminal          |
| <b>D</b> | Domain   | IPR012599 Peptidase C1A, propeptide                 |
| <b>S</b> | Sites    | IPR000169 Cysteine peptidase, cysteine active site  |
| <b>S</b> | Sites    | IPR025660 Cysteine peptidase, histidine active site |
